# Supplementary material for: Temperature sensitivity of soil organic carbon respiration along a forested elevation gradient in the Rwenzori Mountains, Uganda
Source: Copernicus journal article supplement (doi:10.5194/bg-20-719-2023), 2023-02-15
Supplement: Supplementary file 1 [file bg-20-719-2023-supplement.pdf]

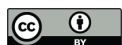

*Supplement of*

**Temperature sensitivity of soil organic carbon respiration along a forested elevation gradient in the Rwenzori Mountains, Uganda**

**Joseph Okello et al.**

*Correspondence to:* Joseph Okello ([joseph.okello@ugent.be](mailto:joseph.okello@ugent.be))

The copyright of individual parts of the supplement might differ from the article licence.

1 **Supplementary information**

2 Table S1. Pearson correlations of CO<sub>2</sub> respiration rate with soil parameters along the Rwenzori elevational gradient  
3 under *in situ* and laboratory incubation.

| Total CO <sub>2</sub> respiration rate at the start of the rainy season            |                     |                 |
|------------------------------------------------------------------------------------|---------------------|-----------------|
| Soil parameter                                                                     | Correlation R value | <i>P</i> -value |
| pH                                                                                 | 0.13                | 0.19            |
| Water-filled pore space                                                            | -0.04               | 0.73            |
| Temperature                                                                        | 0.24                | 0.02*           |
| Organic carbon                                                                     | -0.19               | 0.06            |
| Total nitrogen                                                                     | -0.29               | <0.01*          |
| C:N                                                                                | 0.17                | 0.09            |
| Total CO <sub>2</sub> respiration rate in the mid rainy season                     |                     |                 |
| pH                                                                                 | 0.56                | <0.01*          |
| Water-filled pore space                                                            | 0.25                | 0.01*           |
| Temperature                                                                        | 0.55                | <0.01*          |
| Organic carbon                                                                     | -0.61               | <0.01*          |
| Total nitrogen                                                                     | -0.59               | <0.01*          |
| C:N                                                                                | -0.40               | <0.01*          |
| Specific heterotrophic CO <sub>2</sub> respiration rate from laboratory incubation |                     |                 |
| pH                                                                                 | 0.79                | <0.01*          |
| Temperature                                                                        | 0.73                | <0.01*          |
| Organic carbon                                                                     | -0.73               | <0.01*          |
| Total nitrogen                                                                     | -0.75               | <0.01*          |
| C:N                                                                                | -0.69               | <0.01*          |

4

5 A significant *P*-value is marked with an asterisk symbol “\*”

6 Table S2. The scores of the principle component analysis with correlations for principle component 1 (PC1) and  
7 principle component 2 (PC2). Strong correlation scores above 0.5 by magnitude are shown in bold.

| Parameter                        | PC1 correlation score | PC2 correlation score |
|----------------------------------|-----------------------|-----------------------|
| Total PLFA (bacteria plus fungi) | <b>-0.85</b>          | <b>-0.67</b>          |
| Fungi                            | <b>-0.88</b>          | <b>-0.63</b>          |
| Gram-positive bacteria           | <b>-0.82</b>          | <b>-0.70</b>          |
| Gram-negative bacteria           | <b>-0.66</b>          | <b>-0.89</b>          |
| Bacteria : Fungi                 | 0.39                  | -0.13                 |
| Gram-positive : Gram-negative    | -0.22                 | <b>0.73</b>           |
| Soil pH <sub>KCl</sub>           | <b>0.92</b>           | <b>-0.58</b>          |
| Soil organic carbon              | <b>-1.0</b>           | 0.26                  |
| Soil temperature                 | <b>1.0</b>            | -0.34                 |
| Soil total nitrogen              | <b>-1.00</b>          | 0.25                  |
| Soil C:N                         | <b>-0.90</b>          | 0.34                  |
| Bulk density                     | <b>0.98</b>           | -0.37                 |

8

9

Table S3. Comparison of the *in situ* seasonal soil moisture content at the start and in the mid rainy season, the *in situ* soil temperature at the start and in the mid rainy season, the *in situ* total CO<sub>2</sub> respiration rate at the start and in the mid rainy season, the specific heterotrophic CO<sub>2</sub> respiration rate for control and warmed soil at corresponding field temperature, the specific heterotrophic CO<sub>2</sub> respiration rate for control and warmed soil at uniform reference temperature of 20 °C and 12 °C, the temperature sensitivity Q<sub>10</sub>, and the activation energy at each elevation cluster in the Rwenzori elevational gradient.

| Elevation<br>(m a.s.l.) | Parameter                                                                                                                                                                   |                                                                                                                       | P value |
|-------------------------|-----------------------------------------------------------------------------------------------------------------------------------------------------------------------------|-----------------------------------------------------------------------------------------------------------------------|---------|
|                         | <i>In situ</i> WFPS at the start of rainy season (%)                                                                                                                        | <i>In situ</i> WFPS in the mid rainy season (%)                                                                       |         |
| 1250-1300               | 33.1 ± 1.2 <sup>b</sup>                                                                                                                                                     | 57.2 ± 5.8 <sup>a</sup>                                                                                               | <0.01   |
| 1750-1850               | 22.2 ± 2.5 <sup>c</sup>                                                                                                                                                     | 44.8 ± 3.8 <sup>b</sup>                                                                                               | <0.01   |
| 2100-2200               | 41.7 ± 2.9 <sup>a</sup>                                                                                                                                                     | 45.4 ± 4.8 <sup>b</sup>                                                                                               | <0.01   |
| 2700-3000               | 42.7 ± 8.7 <sup>a</sup>                                                                                                                                                     | 44.5 ± 9.0 <sup>b</sup>                                                                                               | 0.48    |
|                         | <i>In situ</i> temperature at the start of rainy season (°C)                                                                                                                | <i>In situ</i> temperature in the mid rainy season (°C)                                                               |         |
| 1250-1300               | 19.56 ± 0.32 <sup>a</sup>                                                                                                                                                   | 20.44 ± 0.41 <sup>a</sup>                                                                                             | <0.01   |
| 1750-1850               | 16.16 ± 0.43 <sup>b</sup>                                                                                                                                                   | 16.76 ± 0.23 <sup>b</sup>                                                                                             | <0.01   |
| 2100-2200               | 15.02 ± 0.12 <sup>c</sup>                                                                                                                                                   | 16.04 ± 0.68 <sup>c</sup>                                                                                             | <0.01   |
| 2700-3000               | 11.86 ± 0.46 <sup>d</sup>                                                                                                                                                   | 12.32 ± 0.39 <sup>d</sup>                                                                                             | <0.01   |
|                         | <i>In situ</i> total CO <sub>2</sub> respiration rate at the start of rainy season (mg C h <sup>-1</sup> m <sup>-2</sup> )                                                  | <i>In situ</i> total CO <sub>2</sub> respiration rate in the mid rainy season (mg C h <sup>-1</sup> m <sup>-2</sup> ) |         |
| 1250-1300               | 80.1 ± 15.8 <sup>a</sup>                                                                                                                                                    | 113.2 ± 35.7 <sup>a</sup>                                                                                             | <0.01   |
| 1750-1850               | 79.2 ± 17.3 <sup>a</sup>                                                                                                                                                    | 112.8 ± 20.3 <sup>a</sup>                                                                                             | <0.01   |
| 2100-2200               | 95.1 ± 34.6 <sup>a</sup>                                                                                                                                                    | 89.0 ± 22.3 <sup>b</sup>                                                                                              | 0.46    |
| 2700-3000               | 59.3 ± 16.7 <sup>b</sup>                                                                                                                                                    | 67.7 ± 9.7 <sup>c</sup>                                                                                               | 0.05    |
|                         | Specific heterotrophic CO <sub>2</sub> respiration rate at respective field mean annual temperature (µg C h <sup>-1</sup> g <sup>-1</sup> SOC)                              | <sup>13</sup> C isotopic fractionation during heterotrophic CO <sub>2</sub> respiration (epsilon)                     |         |
| 1250-1300               | 17.2 ± 5.3                                                                                                                                                                  | -3.2 ± 0.6                                                                                                            | NA      |
| 1750-1850               | 10.8 ± 4.8                                                                                                                                                                  | -2.8 ± 0.9                                                                                                            | NA      |
| 2100-2200               | 5.3 ± 2.1                                                                                                                                                                   | -1.7 ± 0.7                                                                                                            | NA      |
| 2500-2600               | 3.7 ± 1.9                                                                                                                                                                   | -1.0 ± 1.3                                                                                                            | NA      |
| 2700-3000               | 2.4 ± 0.9                                                                                                                                                                   | 0.3 ± 0.8                                                                                                             | NA      |
|                         | Specific heterotrophic CO <sub>2</sub> respiration rate following <i>in situ</i> soil warming at corresponding field temperature (µg C h <sup>-1</sup> g <sup>-1</sup> SOC) |                                                                                                                       |         |

|                                                                                  | Control       | Warmed        |       |
|----------------------------------------------------------------------------------|---------------|---------------|-------|
| 1250-1300                                                                        | 6.15± 0.28    | NA            | NA    |
| 1750-1850                                                                        | 6.56± 0.61    | 5.48 ± 1.69   | 0.10  |
| 2100-2200                                                                        | 3.22 ± 0.25   | 3.31 ± 1.17   | 0.70  |
| 2500-2600                                                                        | 3.54 ± 0.53   | 3.92 ± 1.40   | 0.06  |
| 2700-3000                                                                        | 3.82 ± 0.45   | 2.74 ± 0.85   | 0.13  |
| Activation energy (kJ mol <sup>-1</sup> )                                        |               |               |       |
|                                                                                  | Control       | Warmed        |       |
| 1250-1300                                                                        | 28.5 ± 5.6    | NA            | NA    |
| 1750-1850                                                                        | 49.2± 17.3    | 30.3 ± 11.0   | 0.23  |
| 2100-2200                                                                        | 60.2 ± 23.1   | 53.6 ± 9.7    | 1.00  |
| 2500-2600                                                                        | 70.3 ± 6.9    | 59.8 ± 4.2    | 0.06  |
| 2700-3000                                                                        | 69.9 ± 3.0    | 73.9 ± 20.7   | 0.80  |
| The sensitivity of CO <sub>2</sub> respiration to temperature (Q <sub>10</sub> ) |               |               |       |
|                                                                                  | Control       | Warmed        |       |
| 1250-1300                                                                        | 1.50 ± 0.13   | NA            | NA    |
| 1750-1850                                                                        | 1.92± 0.57    | 1.70 ± 0.24   | 0.86  |
| 2100-2200                                                                        | 2.67 ± 1.28   | 2.14± 0.44    | 1.00  |
| 2500-2600                                                                        | 2.86 ± 0.40   | 2.52 ± 0.47   | 0.20  |
| 2700-3000                                                                        | 2.68 ± 0.25   | 2.46 ± 0.67   | 0.53  |
| Soil organic carbon (%)                                                          |               |               |       |
| 1750-1850                                                                        | 7.42 ± 1.03   | 5.89 ± 2.10   | 0.343 |
| 2100-2200                                                                        | 13.63 ± 0.52  | 15.62± 4.07   | 1.00  |
| 2500-2600                                                                        | 28.01 ± 3.51  | 23.11 ± 6.01  | 0.229 |
| 2700-3000                                                                        | 31.72 ± 2.10  | 28.65 ± 9.11  | 0.48  |
| Soil δ <sup>13</sup> C (‰)                                                       |               |               |       |
| 1750-1850                                                                        | -26.37 ± 1.10 | -24.79 ± 0.89 | 0.057 |
| 2100-2200                                                                        | -26.30 ± 0.69 | -26.70 ± 0.78 | 0.486 |
| 2500-2600                                                                        | -29.70 ± 0.42 | -28.07 ± 0.72 | 0.057 |
| 2700-3000                                                                        | -28.88 ± 0.39 | -28.58± 1.27  | 0.686 |
| Soil δ <sup>15</sup> N (‰)                                                       |               |               |       |
| 1750-1850                                                                        | 6.74 ± 0.41   | 7.65 ± 0.76   | 0.200 |
| 2100-2200                                                                        | 5.76 ± 0.42   | 5.47 ± 1.26   | 0.886 |
| 2500-2600                                                                        | 1.46 ± 0.61   | 2.61 ± 1.44   | 0.229 |
| 2700-3000                                                                        | 1.15 ± 0.47   | 2.08 ± 0.90   | 0.200 |

16 \*NA indicate that no comparison between control and warmed soil was made because no translocation took place  
17 at elevation cluster 1250-1300 m a.s.l.. Different lowercase letters in superscript (bold) next to values of each

18 elevation cluster (same column) indicate a significant difference among the sites at  $P < 0.05$ , and  $P < 0.05$  (same  
19 row) indicates a significant different between seasons or between control and warmed treatments.

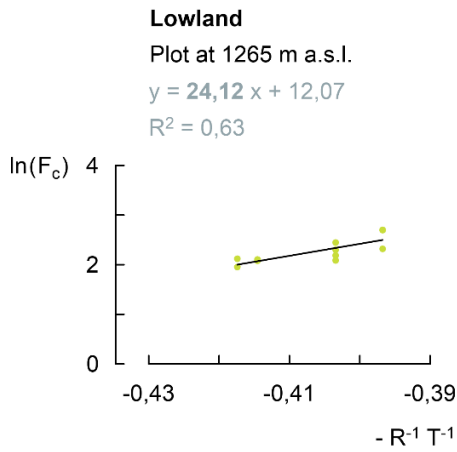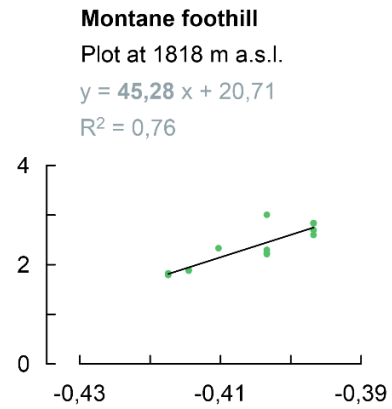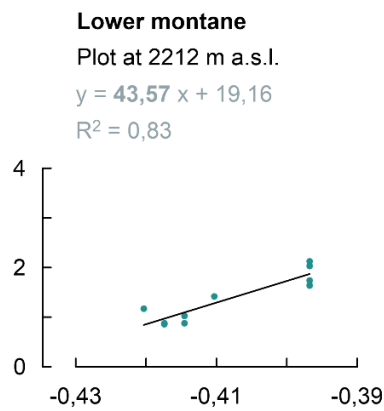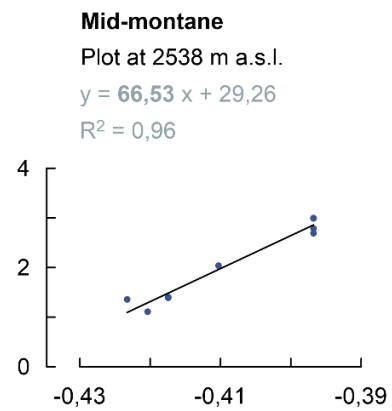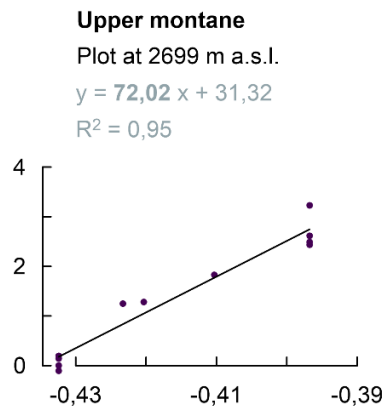

20

21 Figure S1. Graphs to illustrate the curve fitting for the determination of the activation energy, i.e., as the slope of  
 22 the linear regression between log-transformed specific heterotrophic CO<sub>2</sub> respiration rate ( $\ln F_c$ ) and the negative  
 23 inverse of the incubation temperature (T), multiplied with the gas constant (R). Shown here is one representative  
 24 example (one replicate per plot) per elevation cluster.

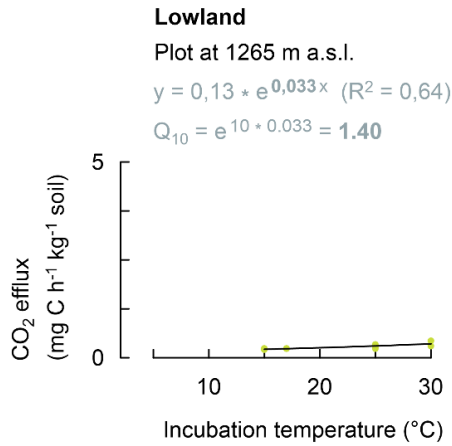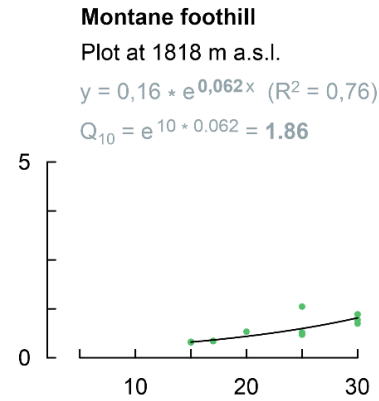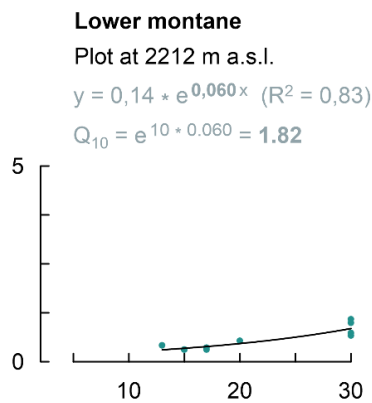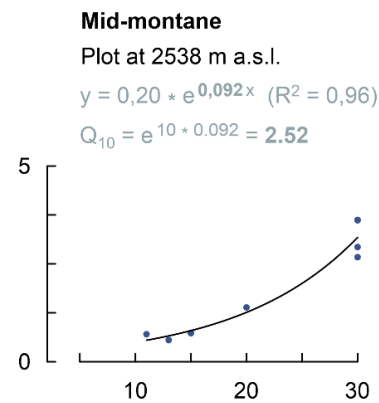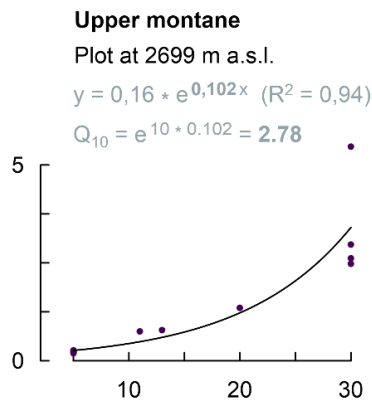

25  
26 Figure S2. Graphs to illustrate the curve fitting for the determination of the sensitivity of heterotrophic CO<sub>2</sub>  
27 respiration rates to temperature ( $Q_{10}$ ) through exponential curve fitting of specific heterotrophic CO<sub>2</sub> respiration  
28 rates at five different incubation temperatures in order to derive parameter k, from which  $Q_{10}$  can be determined.  
29 Shown here is one representative example (i.e. one replicate plot) per elevation cluster.



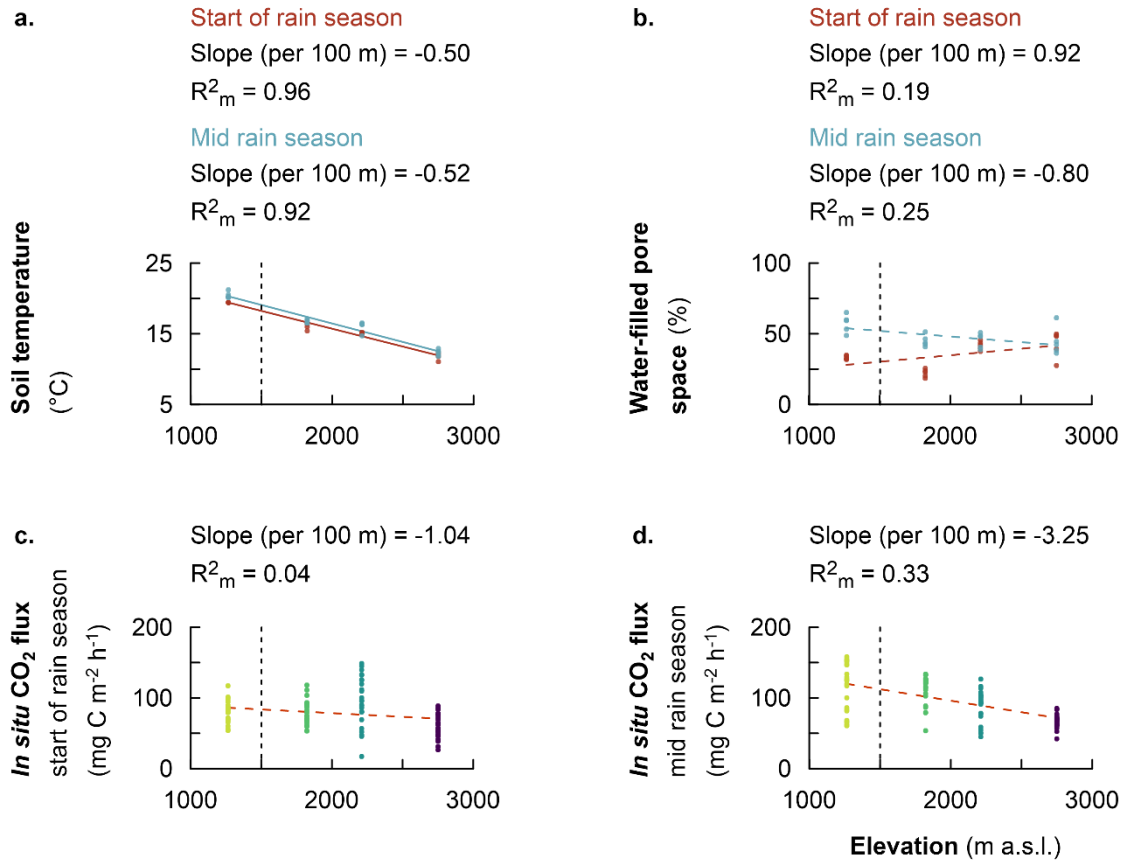

Figure S3. Fixed effect estimates of elevation (per 100 m elevation increase) on response variables: soil temperatures at 5 cm depth at the start of rainy season (red solid line) and in the mid rainy season (blue solid line) (a), water-filled pore space at 5 cm depth at the start of the rainy season (red dashed line) and in the mid rainy season (blue dashed line) (b), *in situ* total CO<sub>2</sub> respiration at the start of the rainy season (c) and *in situ* total CO<sub>2</sub> respiration in the mid rainy season (d). The slope of the linear mixed effect model estimates per 100 m of elevation increase is indicated (solid line for a significant effect and dashed line for no significant effect), as well as the marginal  $R^2$  ( $R^2_m$ ), representing the fraction in response variable explained by elevation. Plots from montane forest clusters (from 1750-3000 m a.s.l.) were compared with a nearby premontane forest (separated by vertical dashed line) at an elevation of 1250-1300 m a.s.l..

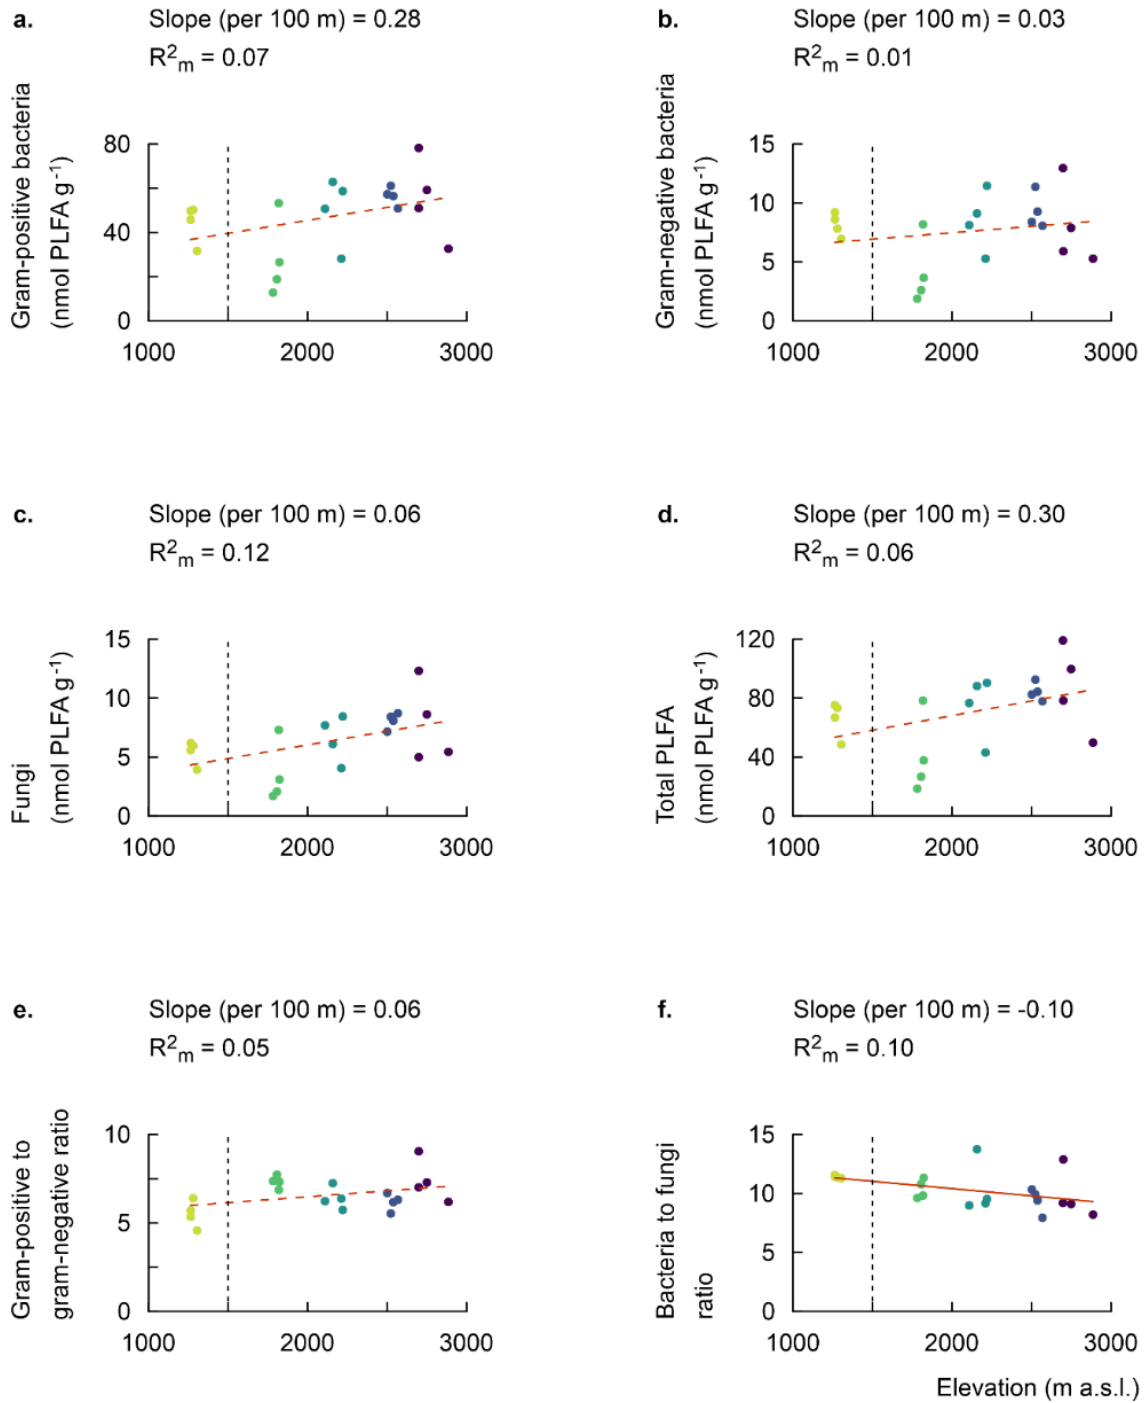

Figure S4. Fixed effect estimates of elevation (per 100 m elevation increase) on response variables: gram-positive bacteria (nmol PLFA g<sup>-1</sup>) (a), gram-negative bacteria (nmol PLFA g<sup>-1</sup>) (b), fungi (nmol PLFA g<sup>-1</sup>) (c), total phospholipid fatty acids (PLFA) for bacteria and fungi (d) (nmol PLFA g<sup>-1</sup>), ratio of gram-positive to gram-negative bacteria (e) and the ratio of bacteria to fungi (f). The slopes of the linear mixed effect model estimates per 100 m of elevation increase are indicated (red solid line for a significant effect and red dashed line for no significant effect), as well as the marginal  $R^2$  ( $R^2_m$ ), representing the fraction in response variable explained by elevation. Plots from montane forest clusters (from 1750-3000 m a.s.l.) were compared with a nearby premontane forest (separated by vertical dashed line) at an elevation of 1250-1300 m a.s.l..

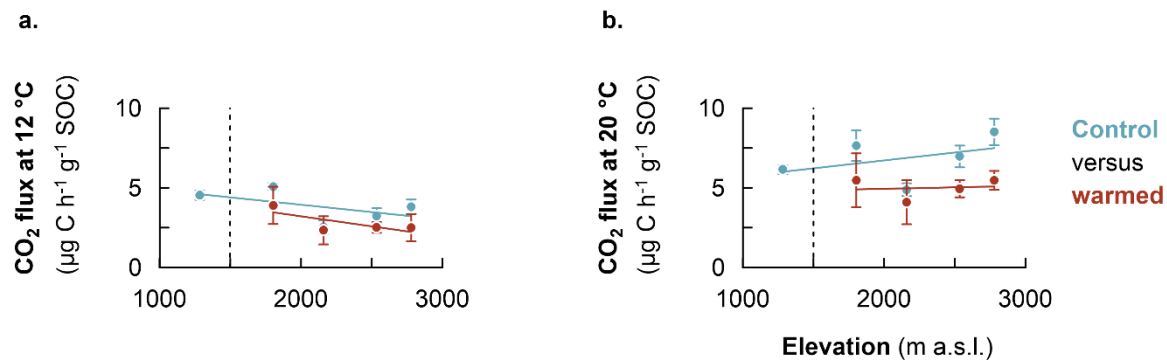

Figure S5. Specific heterotrophic CO<sub>2</sub> respiration rate at uniform reference temperature of 20 °C ( mean annual *in situ* temperature in the lowest elevation cluster at 1250-1300 m a.s.l.) (a) and 12 °C (mean annual *in situ* temperature in the highest elevation cluster at 2700-3000 m a.s.l.) (b).
